# Supplementary material
Source: PubMed Central journal article supplement (PMC4675876)
Supplement: hdy201572x1.pdf [file hdy201572x1.pdf]

**Table S4. Mapping of genes and markers whose *B. mori* orthologues are located near the boundaries between ancient chromosomes in previous studies.**

| <i>B. mori</i> |                       | Other lepidopteran species    |         |          |                         |
|----------------|-----------------------|-------------------------------|---------|----------|-------------------------|
| LG             | location in Kaikobase | Species*                      | LG/Chr. | marker   | References              |
| 11             | 2426323-2420596       | <i>Manduca sexta</i> (n=28)   | 26      | AY172672 | Yasukochi et al. (2009) |
| 11             | 3013878-3014357       | <i>Helicoverpa armigera</i>   | 11      | BU038739 | Sahara et al. (2013)    |
| 11             | 3045089-3045933       | <i>Mamestra brassicae</i>     | 11      | FS940728 | Sahara et al. (2013)    |
| 11             | 3973107-3982669       | <i>Biston betularia</i>       | 11      | JF811446 | Van't Hof et al. (2013) |
| 11             | 4005577-4006128       | <i>Bicyclus anyama</i> (n=28) | 28      | BaC5486  | Beldade et al. (2009)   |
| 11             | 6271907-6272776       | <i>Bicyclus anyama</i> (n=28) | 11      | BaC898   | Beldade et al. (2009)   |
|                |                       | <i>Mamestra brassicae</i>     | 29      | FS940502 | Sahara et al. (2013)    |
| 11             | 6284936-6284433       | <i>Helicoverpa armigera</i>   | 29      | EY118212 | Sahara et al. (2013)    |
| 11             | 6321704-6320023       | <i>Manduca sexta</i> (n=28)   | 11      | BE015478 | Yasukochi et al. (2009) |
| 11             | 7718324-7724331       | <i>Biston betularia</i>       | 29      | HM449923 | Van't Hof et al. (2013) |
| 23             | 15074733-15082387     | <i>Biston betularia</i>       | 23      | JF811452 | Van't Hof et al. (2013) |
| 23             | 16910042-16906460     | <i>Manduca sexta</i> (n=28)   | 23      | L07609   | Yasukochi et al. (2009) |
|                |                       | <i>Bicyclus anyama</i> (n=28) | 23      | BaC5729  | Beldade et al. (2009)   |
| 23             | 17010653-17020983     | <i>Mamestra brassicae</i>     | 23      | FS939804 | Sahara et al. (2013)    |
| 23             | 17064070-17071002     | <i>Helicoverpa armigera</i>   | 23      | EY117529 | Sahara et al. (2013)    |
| 23             | 17417143-17410092     | <i>Biston betularia</i>       | 30      | HM449937 | Van't Hof et al. (2013) |
| 23             | 17507249-17510154     | <i>Bicyclus anyama</i> (n=28) | 16      | BaC2850  | Beldade et al. (2009)   |
| 23             | 18752593-18645601     | <i>Helicoverpa armigera</i>   | 30      | EU599568 | Sahara et al. (2013)    |
| 23             | 19288847-19291160     | <i>Mamestra brassicae</i>     | 30      | FS940691 | Sahara et al. (2013)    |
| 23             | 21738052-21737768     | <i>Manduca sexta</i> (n=28)   | 15      | CA798823 | Yasukochi et al. (2009) |
| 24             | 2084060-2089078       | <i>Bicyclus anyama</i> (n=28) | 2       | BaC495   | Beldade et al. (2009)   |
|                |                       | <i>Manduca sexta</i> (n=28)   | 24      | AI142205 | Yasukochi et al. (2009) |
| 24             | 2709628-2699047       | <i>Mamestra brassicae</i>     | 31      | FS940200 | Sahara et al. (2013)    |
| 24             | 7155448-7171578       | <i>Helicoverpa armigera</i>   | 31      | EY119869 | Sahara et al. (2013)    |
| 24             | 8712977-8719098       | <i>Biston betularia</i>       | 31      | HM355922 | Van't Hof et al. (2013) |
| 24             | 11537851-11527820     | <i>Biston betularia</i>       | 24      | HM449862 | Van't Hof et al. (2013) |
|                |                       | <i>Mamestra brassicae</i>     | 24      | FS940666 | Sahara et al. (2013)    |
| 24             | 13271278-13257578     | <i>Manduca sexta</i> (n=28)   | 22      | BE015464 | Yasukochi et al. (2009) |
| 24             | 13879316-13879077     | <i>Bicyclus anyama</i> (n=28) | 24      | BaC2002  | Beldade et al. (2009)   |
| 24             | 16082543-16081322     | <i>Helicoverpa armigera</i>   | 24      | EE399450 | Sahara et al. (2013)    |

\* Parentheses indicate haploid chromosome number of each species excluding n = 31
